# Supplementary material
Source: PubMed Central journal article supplement (PMC3872268)
Supplement: NIHMS524962-supplement-01.pdf [file NIHMS524962-supplement-01.pdf]

# Database Search Results

1. [gi|541266|pir|JN0915](#) fimbrilin precursor - *Porphyromonas gingivalis* (strain BH18/ 10)
2. [gi|456496|dbj|BAA04622.1](#) fimbrilin [*Porphyromonas gingivalis*]

Sample ID : aE [Pass:0]  
 Measured peptides : 403  
 Matched peptides : 6  
 Min. sequence coverage: 35%

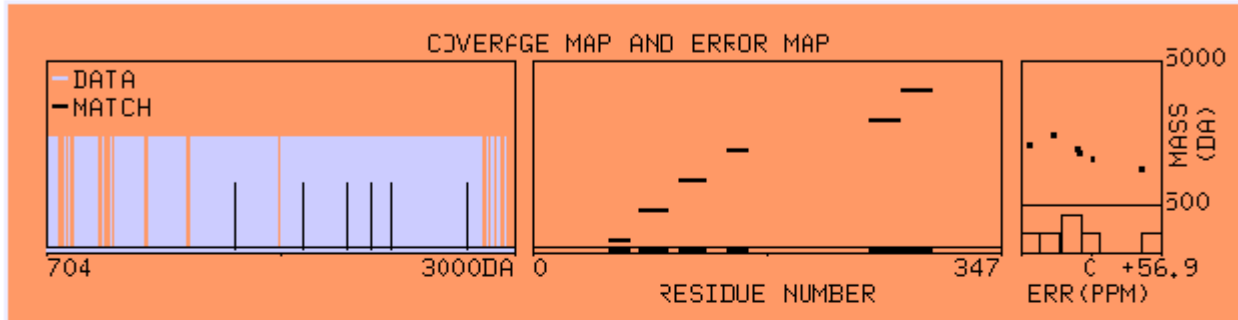

| Measured Mass (M) | Avg/Mono | Computed Mass | Error (ppm) | Residues Start | Residues To | Missed Cut | Peptide sequence         |
|-------------------|----------|---------------|-------------|----------------|-------------|------------|--------------------------|
| 1632.925          | M        | 1532.857      | 42          | 57             | 72          | 0          | TLVVMANTGAMELVCK         |
| 1974.945          | M        | 1974.939      | 3           | 144            | 160         | 0          | VQMSAAVDNIYTFVPEK        |
| 2176.983          | M        | 2177.001      | -8          | 110            | 129         | 0          | NYIGYSGTCEGNHLENDPLK     |
| 2298.064          | M        | 2298.087      | -10         | 250            | 273         | 0          | NCADLAGADLAAAQANWVDAEKK  |
| 2401.089          | M        | 2401.203      | -47         | 79             | 101         | 0          | ALTTVELTAENQEAAGLIMTAEPK |
| 2776.185          | M        | 2776.265      | -29         | 274            | 296         | 0          | TYYPVLVNFNSNNYTYDSNYTPK  |

## Unmatched Monoisotopic Masses:

|          |          |          |          |          |          |          |          |          |          |          |          |          |
|----------|----------|----------|----------|----------|----------|----------|----------|----------|----------|----------|----------|----------|
| 855.042  | 870.016  | 1097.015 | 885.991  | 1060.033 | 1066.066 | 1081.036 | 1112.992 | 1271.077 | 1075.028 | 892.007  | 1044.084 | 795.110  |
| 1302.026 | 810.087  | 1106.001 | 861.060  | 900.984  | 1286.047 | 1090.022 | 1293.064 | 817.092  | 829.068  | 916.971  | 876.033  | 1309.044 |
| 1120.978 | 1498.072 | 1324.011 | 1482.090 | 1513.039 | 908.983  | 1476.062 | 1317.006 | 1355.096 | 1233.123 | 1333.004 | 1050.077 |          |
| 1022.086 | 1537.009 | 1529.007 | 1135.951 | 713.169  | 1104.010 | 984.157  | 1991.910 | 1687.092 | 1551.994 | 923.945  | 1460.101 | 1339.989 |
| 932.953  | 1277.106 | 1491.066 | 1535.003 | 1127.974 | 1469.060 | 1438.118 | 1756.006 | 757.165  | 1749.034 | 711.165  | 1347.980 | 1740.023 |
| 1211.114 | 2153.022 | 1133.982 | 1160.918 | 1113.966 | 704.948  | 1242.068 | 1281.076 | 1356.981 | 1248.091 | 1933.043 | 1239.127 | 733.100  |
| 1543.966 | 1665.095 | 1997.917 | 1363.956 | 2160.031 | 1680.098 | 1264.084 | 1649.145 | 1226.125 | 739.150  | 1150.919 | 949.924  | 1718.042 |
| 1945.072 | 1981.976 | 1724.027 | 1937.056 | 1375.939 | 2216.963 | 1703.064 | 2141.079 | 1542.013 | 1777.976 | 1433.091 | 1922.065 |          |
| 709.171  | 2187.044 | 1444.133 | 941.927  | 2139.046 | 1506.019 | 1144.957 | 1674.110 | 1416.123 | 1763.959 | 2161.033 | 1559.943 | 1793.945 |
| 1266.047 | 1142.939 | 1869.108 | 731.212  | 2202.998 | 1914.056 | 1174.178 | 2148.089 | 1618.965 | 1372.596 | 1692.055 | 2203.993 | 720.929  |
| 1574.930 | 2300.058 | 1708.014 | 955.897  | 947.914  | 1761.960 | 1808.896 | 1521.009 | 1738.018 | 1797.007 | 1920.094 | 2362.060 | 1928.052 |
| 1567.976 | 2013.960 | 2223.909 | 2578.038 | 1733.008 | 1906.042 | 1898.121 | 722.934  | 2132.988 | 1960.032 | 2005.949 | 2387.060 |          |
| 1591.975 | 1549.995 | 2064.929 | 1391.951 | 2322.093 | 2012.918 | 2176.019 | 2056.900 | 957.936  | 2331.021 | 2193.924 | 1854.140 |          |
| 1165.895 | 2460.953 | 1786.949 | 2186.029 | 1952.042 | 1770.983 | 2367.066 | 750.135  | 2352.042 | 2250.938 | 2125.128 | 2742.944 |          |
| 1158.916 | 1581.908 | 2034.935 | 2018.872 | 2170.039 | 2029.885 | 2282.875 | 1908.083 | 3482.036 | 1422.186 | 2272.857 | 1966.964 |          |
| 2117.969 | 2457.971 | 2509.862 | 2170.930 | 1219.144 | 2222.953 | 2415.579 | 1860.081 | 3494.869 | 1168.903 | 2103.105 | 2047.871 |          |
| 2344.112 | 2513.928 | 2443.958 | 2532.759 | 2203.994 | 2376.057 | 1206.122 | 2313.941 | 3149.022 | 1642.051 | 2048.874 | 2059.172 |          |
| 1838.159 | 2517.131 | 2534.071 | 1884.059 | 2063.905 | 2416.861 | 2102.038 | 2132.046 | 2040.950 | 2074.130 | 2194.958 | 2246.822 |          |
| 2108.078 | 2269.935 | 2313.034 | 2320.926 | 2501.904 | 2031.955 | 2285.063 | 2522.988 | 3459.947 | 1596.893 | 2247.875 | 1615.886 |          |
| 2199.021 | 2570.962 | 2399.998 | 2117.022 | 1875.088 | 2230.942 | 755.123  | 2382.993 | 1942.980 | 1866.871 | 2215.923 | 2592.052 |          |
| 2152.972 | 2633.930 | 2345.106 | 2510.827 | 1657.089 | 2095.116 | 2259.535 | 2462.021 | 1832.002 | 2337.121 | 2239.956 | 2354.102 |          |
| 2494.008 | 2365.987 | 1627.206 | 1202.911 | 2262.057 | 2199.992 | 2080.130 | 2647.008 | 1617.912 | 1217.165 | 1891.021 | 2557.025 |          |
| 2629.060 | 2632.976 | 2107.108 | 2375.118 | 2430.018 | 2799.030 | 1621.016 | 2291.852 | 3471.865 | 2783.803 | 2706.911 | 2229.981 |          |
| 2466.898 | 2089.918 | 2041.994 | 2467.830 | 1583.948 | 2594.030 | 1600.594 | 2354.979 | 3430.925 | 2473.884 | 2894.812 | 2678.144 |          |

# Database Search Results

1. gi|20455486|sp|P13793 FMA1\_PORGI Major fimbrial subunit protein, type I precursor (Fimbrillin) (Fimbrillin)
2. gi|79391|pir| A27736 fimbrial protein precursor - Porphyromonas gingivalis
3. gi|456492|dbj|BAA04620.1 fimbrillin [Porphyromonas gingivalis]
4. gi|456494|dbj|BAA04621.1 fimbrillin [Porphyromonas gingivalis]

Sample ID : aE [Pass:0]  
 Measured peptides : 403  
 Matched peptides : 6  
 Min. sequence coverage: 35%

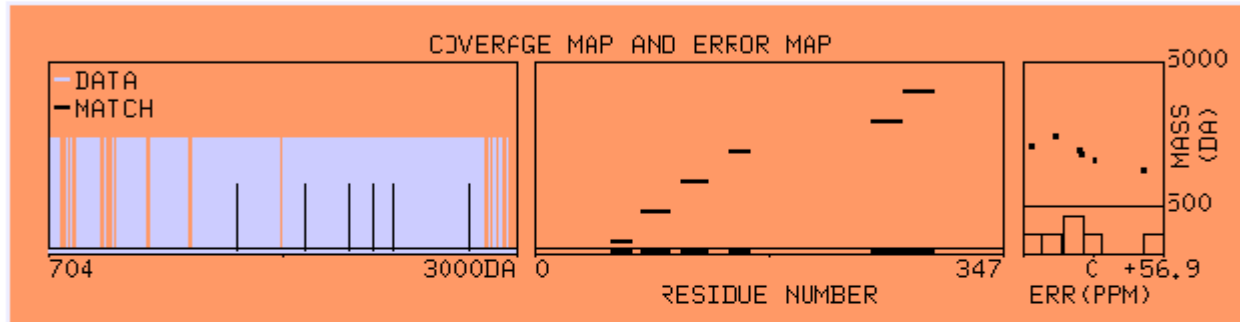

| Measured Mass (M) | Avg/Mono | Computed Mass | Error (ppm) | Residues Start | To  | Missed Cut | Peptide sequence         |
|-------------------|----------|---------------|-------------|----------------|-----|------------|--------------------------|
| 1632.925          | M        | 1532.857      | 42          | 57             | 72  | 0          | TLVVMANTCAMELVCK         |
| 1974.945          | M        | 1974.939      | 3           | 144            | 160 | 0          | VQMSAAYDNIYTFVPEK        |
| 2176.983          | M        | 2177.001      | -8          | 110            | 129 | 0          | NYICYSCTGEGNHIEK         |
| 2298.064          | M        | 2298.087      | -10         | 250            | 273 | 0          | NGADLAGADLAAAQAANWVDAEKG |
| 2401.089          | M        | 2401.203      | -47         | 79             | 101 | 0          | ALTTeltaENQEAAGLIMTAEPK  |
| 2776.185          | M        | 2776.265      | -29         | 274            | 296 | 0          | TYYPVLVNINSNNYTDSTNTPK   |

## Unmatched Monoisotopic Masses:

|          |          |          |          |          |          |          |          |          |          |          |          |          |
|----------|----------|----------|----------|----------|----------|----------|----------|----------|----------|----------|----------|----------|
| 855.042  | 870.016  | 1097.015 | 885.991  | 1060.033 | 1066.066 | 1081.036 | 1112.992 | 1271.077 | 1075.028 | 892.007  | 1044.084 | 795.110  |
| 1302.026 | 810.087  | 1106.001 | 861.060  | 900.984  | 1286.047 | 1090.022 | 1293.064 | 817.092  | 829.068  | 916.971  | 876.033  | 1309.044 |
| 1120.978 | 1498.072 | 1324.011 | 1482.090 | 1513.039 | 908.983  | 1476.062 | 1317.006 | 1355.096 | 1233.123 | 1333.004 | 1050.077 |          |
| 1022.086 | 1537.009 | 1529.007 | 1135.951 | 713.169  | 1104.010 | 984.157  | 1991.910 | 1687.092 | 1551.994 | 923.945  | 1460.101 | 1339.989 |
| 932.953  | 1277.106 | 1491.066 | 1535.000 | 1127.974 | 1469.060 | 1438.118 | 1756.006 | 737.165  | 1749.034 | 711.165  | 1347.980 | 1740.023 |
| 1211.114 | 2153.022 | 1133.982 | 1160.918 | 1113.966 | 704.948  | 1242.068 | 1281.076 | 1356.981 | 1248.091 | 1935.043 | 1239.127 | 733.103  |
| 1543.966 | 1663.095 | 1997.917 | 1363.956 | 2160.031 | 1680.098 | 1264.084 | 1649.145 | 1226.125 | 739.150  | 1150.919 | 949.924  | 1718.042 |
| 1945.072 | 1981.976 | 1724.027 | 1937.056 | 1375.939 | 2216.963 | 1703.064 | 2141.079 | 1542.013 | 1777.976 | 1453.091 | 1922.065 |          |
| 709.171  | 2187.044 | 1444.133 | 941.927  | 2139.046 | 1506.019 | 1144.953 | 1674.110 | 1416.123 | 1763.959 | 2161.033 | 1559.943 | 1793.945 |
| 1266.047 | 1142.939 | 1869.108 | 731.212  | 2202.998 | 1914.056 | 1174.178 | 2148.089 | 1618.965 | 1372.596 | 1692.055 | 2203.993 | 720.929  |
| 1574.950 | 2300.058 | 1708.014 | 955.892  | 947.914  | 1761.960 | 1808.896 | 1521.009 | 1738.018 | 1797.007 | 1920.094 | 2362.060 | 1928.052 |
| 1567.976 | 2013.960 | 2223.909 | 2578.038 | 1733.008 | 1906.042 | 1898.121 | 722.934  | 2132.988 | 1960.032 | 2005.949 | 2387.060 |          |
| 1591.975 | 1549.995 | 2064.929 | 1391.951 | 2322.093 | 2012.918 | 2176.019 | 2056.900 | 957.936  | 2331.021 | 2193.924 | 1854.140 |          |
| 1165.895 | 2460.953 | 1786.949 | 2186.029 | 1952.042 | 1770.983 | 2367.066 | 750.135  | 2352.042 | 2250.938 | 2125.128 | 2742.944 |          |
| 1158.916 | 1581.908 | 2034.935 | 2018.872 | 2171.039 | 2029.885 | 2282.875 | 1908.083 | 3482.036 | 1422.186 | 2272.857 | 1966.964 |          |
| 2117.969 | 2457.971 | 2509.862 | 2170.930 | 1219.144 | 2222.953 | 2415.579 | 1860.081 | 3494.869 | 1168.903 | 2103.105 | 2047.871 |          |
| 2344.112 | 2513.928 | 2443.958 | 2532.759 | 2203.994 | 2376.057 | 1206.122 | 2313.941 | 3149.022 | 1642.051 | 2048.874 | 2059.172 |          |
| 1838.139 | 2517.131 | 2534.071 | 1884.059 | 2063.905 | 2416.861 | 2102.038 | 2132.046 | 3040.950 | 2074.130 | 2194.958 | 2246.822 |          |

# Database Search Results

1. gi|2443396|dbj|BAA22414.1 Firbrilin [Porphyromonas gingivalis]

Sample ID : aE [Pass:0]  
 Measured peptides : 403  
 Matched peptides : 4  
 Min. sequence coverage: 33%

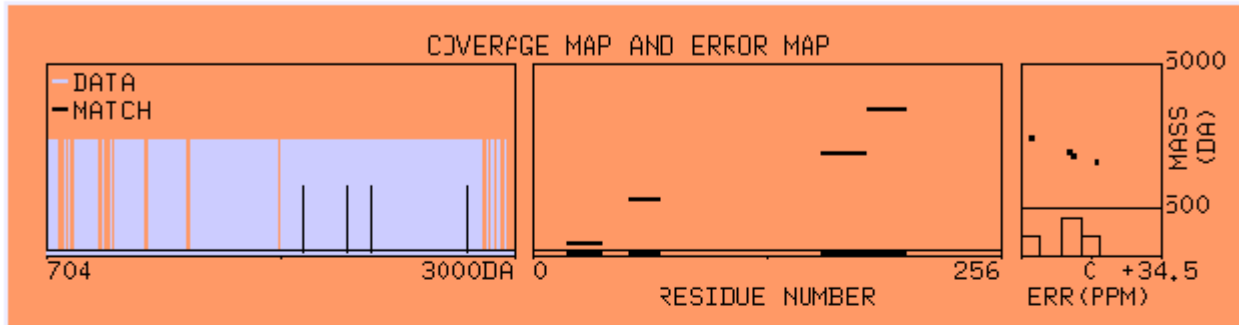

| Measured Mass (M) | Avg/ Mono | Computed Mass | Error (ppm) | Residues Start | Residues To | Missed Cut | Peptide sequence         |
|-------------------|-----------|---------------|-------------|----------------|-------------|------------|--------------------------|
| 1974.945          | M         | 1974.939      | 3           | 53             | 69          | 0          | VQMSAAAYDNIYTFVPEK       |
| 2176.983          | M         | 2177.001      | -8          | 19             | 38          | 0          | NYIGYSCTCEGNHIENDPLK     |
| 2298.064          | M         | 2298.087      | -10         | 159            | 182         | 0          | NGADLAGADLAAAQAANWVDAEGK |
| 2776.185          | M         | 2776.265      | -29         | 183            | 205         | 0          | TYYPVLVNFNSNNYTYDSNYTPK  |

## Unmatched Monoisotopic Masses:

|          |          |          |          |          |          |          |          |          |          |          |          |          |
|----------|----------|----------|----------|----------|----------|----------|----------|----------|----------|----------|----------|----------|
| 855.042  | 870.016  | 1097.015 | 885.991  | 1060.033 | 1066.066 | 1081.036 | 1112.992 | 1271.077 | 1075.028 | 892.007  | 1044.084 | 795.110  |
| 1302.026 | 810.087  | 1106.001 | 861.060  | 900.984  | 1286.047 | 1090.022 | 1293.064 | 817.092  | 829.068  | 916.971  | 876.033  | 1309.044 |
| 1120.978 | 1498.072 | 1324.011 | 1482.090 | 1513.039 | 908.983  | 1476.062 | 1317.006 | 1355.096 | 1233.123 | 1333.004 | 1050.077 |          |
| 1022.086 | 1537.009 | 1529.007 | 1135.951 | 713.169  | 1104.010 | 984.157  | 1991.910 | 1687.092 | 1551.994 | 923.945  | 1460.101 | 1339.989 |
| 932.953  | 1277.106 | 1491.066 | 1535.000 | 1127.974 | 1469.060 | 1438.118 | 1756.006 | 737.165  | 1749.034 | 711.165  | 1347.980 | 1740.023 |
| 1211.114 | 2155.022 | 1133.982 | 1160.918 | 1113.966 | 704.948  | 1242.068 | 1281.076 | 1356.981 | 1248.091 | 1935.043 | 1239.127 | 733.103  |
| 1543.966 | 1665.095 | 1997.917 | 1363.956 | 2160.031 | 1680.098 | 1264.084 | 1649.145 | 1226.125 | 739.150  | 1150.919 | 949.924  | 1718.042 |
| 1945.072 | 1981.976 | 1724.027 | 1937.056 | 1375.939 | 2216.963 | 1703.064 | 2141.079 | 1542.013 | 1777.976 | 1453.091 | 1922.065 |          |
| 709.171  | 2187.044 | 1444.133 | 941.927  | 2139.046 | 1506.019 | 1144.957 | 1674.110 | 1416.123 | 1763.959 | 2161.033 | 1559.943 | 1793.945 |
| 1266.047 | 1142.939 | 1869.108 | 731.212  | 2202.998 | 1914.056 | 1174.178 | 2148.089 | 1618.965 | 1372.596 | 1692.055 | 2203.993 | 720.929  |
| 1574.950 | 2300.058 | 1708.014 | 955.899  | 947.914  | 1761.960 | 1808.896 | 1521.009 | 1738.018 | 1797.007 | 1920.094 | 2362.060 | 1928.052 |
| 1567.976 | 2013.960 | 2223.909 | 2578.038 | 1733.008 | 1906.042 | 1898.121 | 722.934  | 2132.988 | 1960.032 | 2005.949 | 2387.060 |          |
| 1591.975 | 1549.995 | 2064.929 | 1391.951 | 2322.093 | 2012.918 | 2176.019 | 2056.900 | 957.936  | 2331.021 | 2193.924 | 1854.140 |          |
| 1165.895 | 2460.953 | 1786.949 | 2186.029 | 1952.042 | 1770.983 | 2367.066 | 750.135  | 2352.042 | 2250.938 | 2125.128 | 2742.944 |          |
| 1158.916 | 1581.908 | 2034.935 | 2018.872 | 2170.039 | 2029.885 | 2282.875 | 1908.083 | 3482.036 | 1422.186 | 2272.857 | 1966.964 |          |
| 2117.969 | 2457.971 | 2509.862 | 2170.930 | 1219.144 | 2222.953 | 2415.579 | 1860.081 | 3494.869 | 1168.903 | 2103.105 | 2047.871 |          |
| 2344.112 | 2515.928 | 2443.958 | 2532.759 | 2203.994 | 2376.057 | 1206.122 | 2313.941 | 3149.022 | 1642.051 | 2048.874 | 2059.172 |          |
| 1838.139 | 2517.131 | 2534.071 | 1884.059 | 2063.905 | 2416.861 | 2102.038 | 2132.046 | 3040.950 | 2074.130 | 2194.958 | 2246.822 |          |
| 2108.078 | 2269.935 | 2313.024 | 2320.926 | 2501.904 | 2021.955 | 2285.063 | 2522.988 | 3459.947 | 1596.893 | 2247.875 | 1615.886 |          |
| 2199.021 | 2570.962 | 2399.998 | 2402.097 | 2117.022 | 1876.088 | 2230.542 | 755.123  | 2382.993 | 1942.980 | 1866.871 | 2215.923 |          |
| 2592.052 | 2152.972 | 2633.930 | 2345.106 | 2511.827 | 1657.089 | 2095.116 | 2239.935 | 3462.021 | 1832.002 | 2337.121 | 1633.932 |          |
| 2239.956 | 2354.102 | 2494.008 | 2365.937 | 1627.206 | 1202.911 | 2262.057 | 2199.992 | 3080.130 | 2647.008 | 1617.912 | 1217.165 |          |
| 1891.021 | 2557.029 | 2629.060 | 2632.976 | 2107.108 | 2375.118 | 2430.018 | 2799.030 | 1621.016 | 2291.852 | 2471.865 | 2783.802 |          |
| 2706.911 | 2229.981 | 2466.898 | 2089.918 | 2041.994 | 2467.830 | 1588.548 | 2594.030 | 1600.994 | 2354.979 | 2430.925 | 2473.884 |          |
| 2894.812 | 2678.144 | 2601.114 | 2361.030 | 1799.897 | 2335.984 | 2388.011 | 2548.107 | 3896.102 | 2744.796 | 2655.929 | 2019.938 |          |
| 2124.122 | 2538.143 | 2699.015 | 2208.123 | 2450.032 | 2004.915 | 2078.874 | 2727.861 | 3612.985 | 2563.055 | 2808.268 | 2442.862 |          |
| 2657.017 | 1604.720 | 2790.902 | 2932.825 | 2499.932 | 2095.921 | 2328.591 | 2620.930 | 3619.987 | 2659.797 | 2290.909 | 2660.961 |          |
| 2549.039 | 2808.959 | 2490.062 | 2268.835 | 2564.077 | 2450.951 | 2538.822 | 2599.040 | 3766.913 | 2036.001 | 2740.063 | 2584.055 |          |

# Database Search Results

1. gi|150844|gb|AAA16482.1 fimbrillin

Sample ID : aE [Pass:0]  
 Measured peptides : 403  
 Matched peptides : 5  
 Min. sequence coverage: 30%

COVERAGE MAP AND ERROR MAP

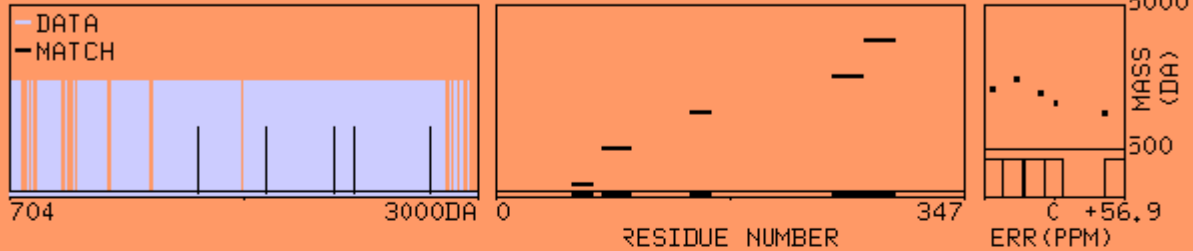

| Measured Mass (M) | Avg/ Mono | Computed Mass | Error (ppm) | Residues Start | Residues To | Missed Cut | Peptide sequence         |
|-------------------|-----------|---------------|-------------|----------------|-------------|------------|--------------------------|
| 1632.925          | M         | 1532.857      | 42          | 57             | 72          | 0          | TLVVMANTCAMELVGK         |
| 1974.945          | M         | 1974.939      | 3           | 144            | 160         | 0          | VQMSAAAYDNIYTFVPEK       |
| 2298.064          | M         | 2298.087      | -10         | 250            | 273         | 0          | NGADLAGADLAAAQAANWVDAEKG |
| 2401.089          | M         | 2401.203      | -47         | 79             | 101         | 0          | ALTTVELTAENQEAAGLIMTAEPK |
| 2776.185          | M         | 2776.265      | -29         | 274            | 296         | 0          | TYYPVLVNPNNSNNYTYDSNYTPK |

## Unmatched Monoisotopic Masses:

|          |          |          |          |          |          |          |          |          |          |          |          |          |
|----------|----------|----------|----------|----------|----------|----------|----------|----------|----------|----------|----------|----------|
| 855.042  | 870.016  | 1097.015 | 885.991  | 1060.033 | 1066.066 | 1081.036 | 1112.992 | 1271.077 | 1075.028 | 892.007  | 1044.084 | 795.110  |
| 1302.026 | 810.087  | 1106.001 | 861.060  | 900.984  | 1286.047 | 1090.022 | 1293.064 | 817.092  | 829.068  | 916.971  | 876.033  | 1309.044 |
| 1120.978 | 1498.072 | 1324.011 | 1482.090 | 2177.991 | 1513.039 | 908.983  | 1476.062 | 1317.006 | 1255.096 | 1233.123 | 1333.004 |          |
| 1050.077 | 1022.086 | 1537.009 | 1529.037 | 1135.951 | 713.169  | 1104.010 | 984.157  | 1991.910 | 1687.092 | 1551.994 | 928.945  | 1460.101 |
| 1339.989 | 932.953  | 1277.106 | 1491.065 | 1535.000 | 1127.974 | 1469.060 | 1438.118 | 1756.006 | 757.165  | 1749.034 | 711.165  | 1347.980 |
| 1740.023 | 1211.114 | 2155.022 | 1133.932 | 1160.918 | 1118.966 | 704.948  | 1242.068 | 1381.076 | 1356.981 | 1248.091 | 1935.043 |          |
| 1239.127 | 733.100  | 1543.966 | 1665.095 | 1997.917 | 1363.956 | 2160.021 | 1680.098 | 1364.084 | 1649.145 | 1226.125 | 739.150  | 1150.919 |
| 949.924  | 1718.042 | 1945.072 | 1981.975 | 1724.027 | 1937.056 | 1376.929 | 2216.963 | 1703.064 | 2141.079 | 1542.013 | 1777.976 |          |
| 1453.091 | 1922.069 | 709.171  | 2187.044 | 1444.133 | 941.927  | 2139.046 | 1506.019 | 1144.957 | 1674.110 | 1416.123 | 1763.959 | 2161.033 |
| 1559.943 | 1793.946 | 1266.047 | 1142.939 | 1869.108 | 731.212  | 2202.958 | 1914.056 | 1174.178 | 2148.089 | 1618.965 | 1372.596 |          |
| 1692.055 | 2203.993 | 720.929  | 1574.953 | 2300.058 | 1708.014 | 955.895  | 947.914  | 1761.960 | 1808.896 | 1521.009 | 1738.018 | 1797.007 |
| 1920.094 | 2362.060 | 1928.052 | 1567.976 | 2013.960 | 2223.909 | 2578.008 | 1733.008 | 1906.042 | 1898.121 | 722.934  | 2132.988 |          |
| 1960.032 | 2005.949 | 2387.060 | 1591.975 | 1549.995 | 2064.929 | 1391.551 | 2322.093 | 3012.918 | 2176.019 | 2056.900 | 957.936  |          |
| 2331.021 | 2193.924 | 1854.140 | 1165.895 | 2460.953 | 1786.949 | 2186.029 | 1952.042 | 1770.983 | 2367.066 | 750.135  | 2252.042 |          |
| 2250.938 | 2125.128 | 2742.944 | 1158.916 | 1581.908 | 2034.935 | 2018.872 | 2170.039 | 3029.885 | 2282.875 | 1908.083 | 2482.036 |          |
| 1422.186 | 2272.857 | 1966.964 | 2117.959 | 2457.971 | 1509.862 | 2170.580 | 1219.144 | 2222.953 | 2415.979 | 1860.081 | 2494.865 |          |
| 1168.903 | 2103.105 | 2047.871 | 2344.112 | 2515.928 | 2443.958 | 2532.759 | 2208.994 | 3376.057 | 1206.122 | 2313.941 | 2149.022 |          |
| 1642.051 | 2048.874 | 2059.172 | 1838.159 | 2517.131 | 2534.071 | 1884.069 | 2063.905 | 3416.861 | 2102.038 | 2132.046 | 2040.950 |          |
| 2074.130 | 2194.958 | 2246.822 | 2108.078 | 2269.935 | 2313.034 | 2320.526 | 2501.904 | 3031.955 | 2285.063 | 2522.988 | 2459.947 |          |
| 1596.893 | 2247.875 | 1615.886 | 2199.021 | 2570.962 | 2399.998 | 2117.022 | 1876.088 | 2230.942 | 755.123  | 2382.993 | 1942.980 |          |
| 1866.871 | 2215.923 | 2592.052 | 2152.972 | 2633.930 | 2345.106 | 2510.827 | 1657.089 | 3095.116 | 2259.935 | 2462.021 | 1832.002 |          |
| 2337.121 | 2239.956 | 2354.102 | 2494.038 | 2365.987 | 1627.206 | 1202.511 | 2262.057 | 3199.992 | 2080.130 | 2647.008 | 1617.912 |          |
| 1217.165 | 1891.021 | 2557.029 | 2629.050 | 2632.976 | 2107.108 | 2375.118 | 2430.018 | 3799.030 | 1621.016 | 2291.852 | 2471.862 |          |
| 2783.803 | 2706.911 | 2229.981 | 2466.898 | 2089.918 | 2041.994 | 2467.830 | 1588.948 | 3594.030 | 1600.994 | 2334.979 | 2430.921 |          |
| 2473.884 | 2894.812 | 2678.144 | 2601.114 | 2361.030 | 1799.897 | 2335.584 | 2388.011 | 3548.107 | 2896.102 | 2744.796 | 2655.925 |          |
| 2019.938 | 2124.122 | 2538.143 | 2699.015 | 2203.123 | 2450.032 | 2004.515 | 2078.874 | 3727.861 | 2612.985 | 2563.055 | 2808.266 |          |
| 2442.863 | 2657.017 | 1604.720 | 2790.932 | 2932.825 | 2499.932 | 2095.521 | 2328.991 | 3620.930 | 2619.987 | 2639.797 | 2290.905 |          |

# Database Search Results

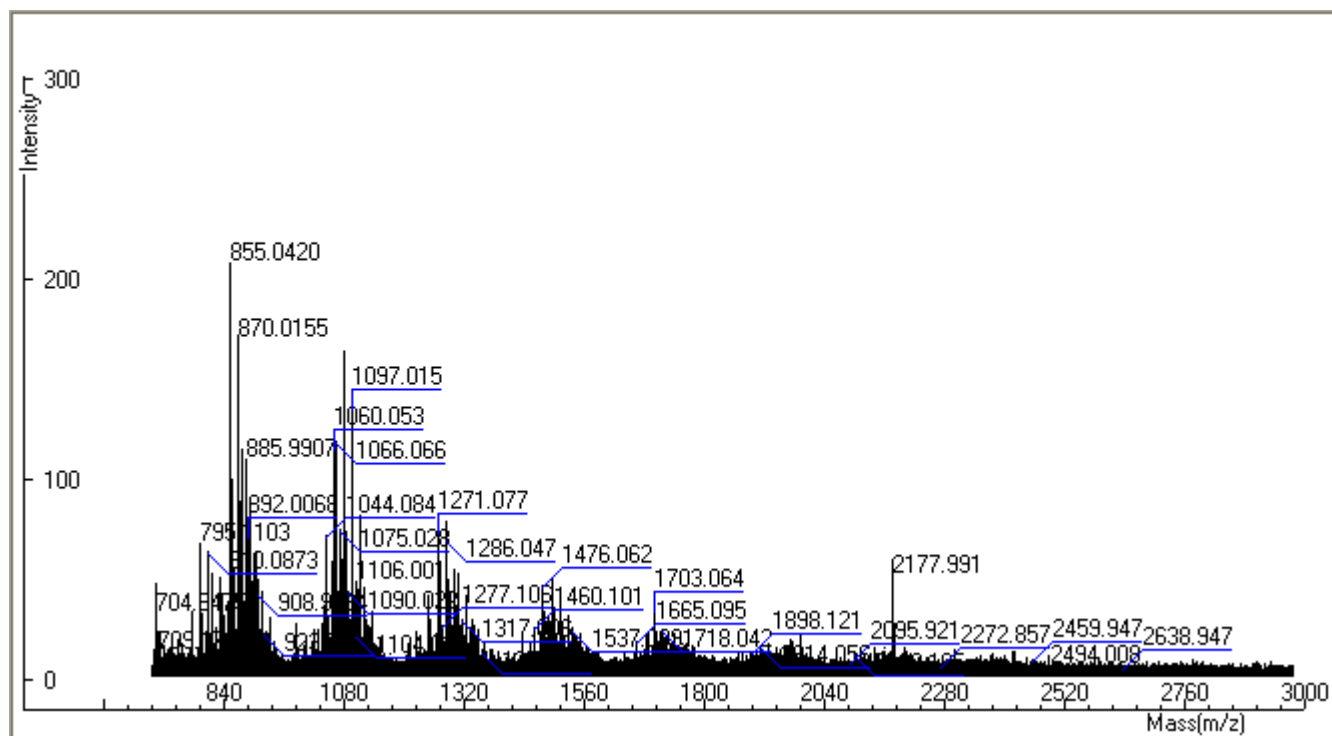

|   | 1 | 2 | 3 | 4 | 5 | 6 | 7 | 8 | 9 | 10 | 11 | 12 |
|---|---|---|---|---|---|---|---|---|---|----|----|----|
| A | ● | ● | ● | ○ | ● | ● | ● | ● | ○ | ○  | ○  | ○  |
| B | ○ | ○ | ● | ○ | ● | ○ | ● | ● | ○ | ○  | ○  | ○  |
| C | ○ | ○ | ● | ○ | ● | ● | ● | ● | ○ | ○  | ○  | ○  |
| D | ● | ○ | ● | ○ | ● | ○ | ● | ● | ○ | ○  | ○  | ○  |
| E | ○ | ○ | ○ | ○ | ● | ● | ● | ● | ○ | ○  | ○  | ○  |
| F | ○ | ○ | ○ | ○ | ○ | ● | ● | ● | ○ | ○  | ○  | ○  |
| G | ○ | ○ | ○ | ○ | ○ | ○ | ● | ● | ○ | ○  | ○  | ○  |
| H | ○ | ○ | ● | ● | ○ | ● | ● | ○ | ○ | ○  | ○  | ○  |
